# Supplementary material
Source: HighWire-hosted journal article supplement (http://www.jrheum.org/highwire/filestream/31865/field_highwire_adjunct_files/0/161114DataSuppl.pdf)

## ONLINE SUPPLEMENTARY DATA

Supplementary Figure 1. Quality assessment according to QUADAS-2.

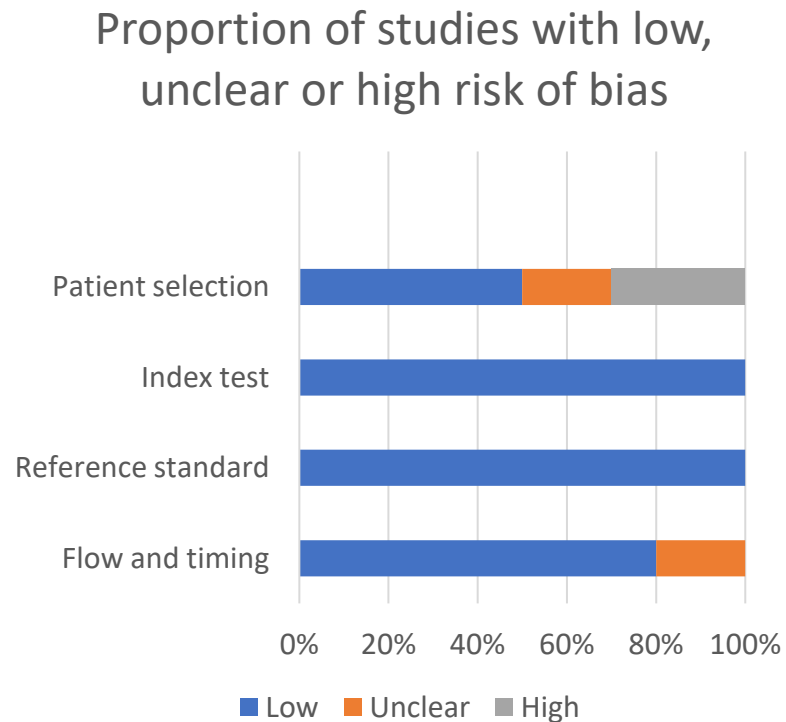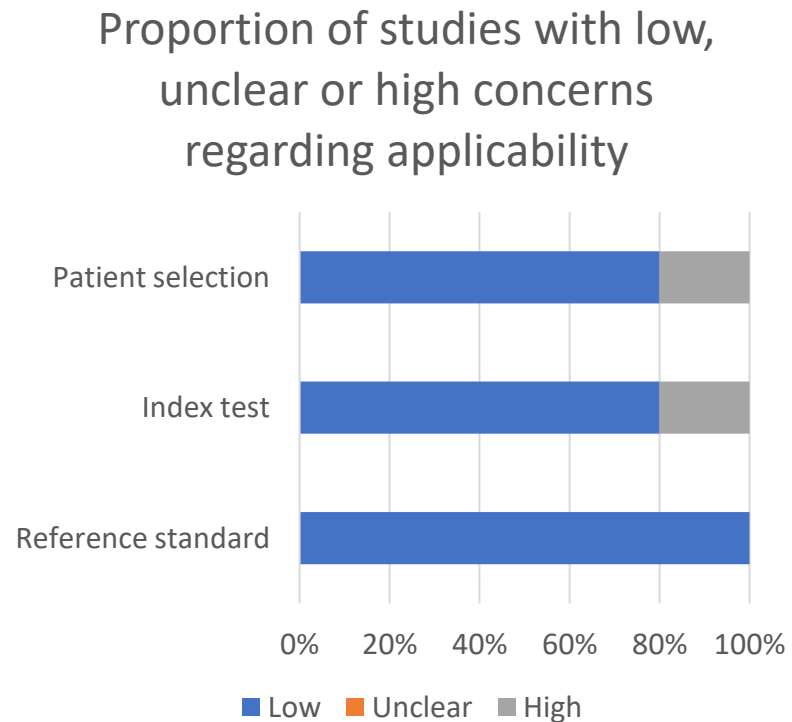

Supplement: 161114DataSuppl.pdf [file 161114DataSuppl.pdf]
